# Supplementary material
Source: PubMed Central journal article supplement (PMC5710190)
Supplement: jamaoncol-3-1495-s001.pdf [file jamaoncol-3-1495-s001.pdf]

## Supplementary Online Content

Cho N, Han W, and Han B-K, et al. Breast cancer screening with mammography plus ultrasonography or magnetic resonance imaging in women 50 years or younger at diagnosis and treated with breast conservation therapy. *JAMA Oncol*. Published online June 22, 2017. doi:10.1001/jamaoncol.2017.1256

**eAppendix.** Characteristics of the Study Cohort

**eTable 1.** Summary of Cancer Detection and Tumor Characteristics of 754 Participants

**eTable 2.** Characteristics of Detected Cancers in Women Treated With Breast Conservation Therapy

**eTable 3.** Screening Performances for Invasive Cancers in 754 Participants Screened Over 3 Years by Mammography, Ultrasound, and MRI

**eTable 4.** Characteristics of Women With Second Breast Cancers Versus Those Without Cancers

This supplementary material has been provided by the authors to give readers additional information about their work.

## **eAppendix. Characteristics of the Study Cohort**

### ***Clinicopathologic Features and Treatment Data of Initial Breast Cancers***

The median age at the first imaging examination was 44 years (range, 22-52 years) (Table 1). Initial tumor stages of the study participants varied; 55% of the participants had stage 0 or I tumors, and 45% of them had stage II or III tumors. Chemotherapy was administered to 67% (507/754) of the participating women. Of the 557 women with HR-positive tumors, adjuvant endocrine therapy was administered to 545 women (98%). Neoadjuvant or adjuvant trastuzumab was administered to 77% (70/91) of the women with HER2-positive cancers.

### ***Characteristics of Women with Second Breast Cancers***

By univariate analysis, the following variables were significantly associated with women with a second breast cancer: pre- or peri-menopausal status (4% [12/341] vs 1% [5/413] ( $P = .03$ ), ER-negative tumors (4% [9/206] vs 1% [8/545]) ( $P = .03$ ), PR-negative tumors (4% [11/272] vs 1% [6/480]) ( $P = .01$ ), HER2-positive tumors (7% [6/91] vs 2% [11/652]) ( $P = .01$ ), resection margin  $\leq 2$  mm status (3% [12/361] vs 1% [4/391]) ( $P = .03$ ), and no endocrine treatment (4% [9/206] vs 1% [8/545]) ( $P = .03$ ) (eTable 4).

By multivariate analysis including the menopausal status, ER-negativity, resection margin  $\leq 2$  mm status, and HER2-positive tumors, HER2-positive tumors (odds ratio, 4.1; 95% CI, 1.5 - 11.4;  $P = .007$ , c-statistics = .62) remained as an independent variable. All second breast cancers in women with HER2-positive tumors were found in the ipsilateral breast.

**eTable 1.** Summary of Cancer Detection and Tumor Characteristics of 754 Participants

|                                                  | Detected Cancer  |          |                          |                         |                                    | Total       |
|--------------------------------------------------|------------------|----------|--------------------------|-------------------------|------------------------------------|-------------|
|                                                  | Mammography Only | MRI Only | Both Mammography and MRI | Both Ultrasound and MRI | Mammography and Ultrasound and MRI |             |
| No. of participants                              | 754              | 754      | 754                      | 754                     | 754                                | NA          |
| No. of screens                                   | 2065             | 2065     | 2065                     | 2065                    | 2065                               | NA          |
| No. of cancers                                   | 2                | 3        | 1                        | 5                       | 6                                  | 17          |
| Invasive cancers                                 | 1 (50)           | 2 (67)   | 0                        | 3 (60)                  | 4 (67)                             | 10 (59)     |
| DCIS                                             | 1 (50)           | 1 (33)   | 1 (100)                  | 2 (40)                  | 2 (33)                             | 7 (41)      |
| Size of invasive tumor, median (range), mm       | 8                | 3 (1-5)  | NA                       | 11 (10-75)              | 20 (8-25)                          | 10.5 (1-75) |
| Node positive, No. (%)                           | 0                | 0        | 0                        | 0                       | 1 (25)                             | 1 (10)      |
| Cancer type, grade, and receptor status, No. (%) |                  |          |                          |                         |                                    |             |
| IDC grade                                        | 1 (50)           | 2 (67)   | 0                        | 3 (60)                  | 4 (67)                             | 10 (59)     |
| High                                             | 0                | 0        | 0                        | 3 (60)                  | 3 (50)                             | 6 (35)      |
| Intermediate                                     | 1 (50)           | 1 (33)   | 0                        | 0                       | 1 (17)                             | 3 (18)      |
| Low                                              | 0                | 1 (33)   | 0                        | 0                       | 0                                  | 1 (6)       |
| ILC                                              | 0                | 0        | 0                        | 0                       | 0                                  | 0           |
| DCIS, nuclear grade                              | 1 (50)           | 1 (33)   | 1 (100)                  | 2 (40)                  | 2 (33)                             | 7 (41)      |
| High                                             | 0                | 0        | 1 (100)                  | 1 (20)                  | 2 (33)                             | 4 (24)      |
| Intermediate                                     | 1 (50)           | 1 (33)   | 0                        | 0                       | 0                                  | 2 (12)      |
| Low                                              | 0                | 0        | 0                        | 1 (20)                  | 0                                  | 1 (6)       |
| Hormone receptor status                          |                  |          |                          |                         |                                    |             |
| Positive                                         | 2 (100)          | 3 (100)  | 0                        | 1 (20)                  | 3 (50)                             | 9 (53)      |
| Negative                                         | 0                | 0        | 1 (100)                  | 4 (80)                  | 3 (50)                             | 8 (47)      |
| HER2 status                                      |                  |          |                          |                         |                                    |             |
| Positive                                         | 0                | 2 (67)   | 1 (100)                  | 2 (40)                  | 2 (33)                             | 7 (41)      |
| Negative                                         | 2 (100)          | 1 (33)   | 0                        | 3 (60)                  | 4 (67)                             | 10 (59)     |

Abbreviations: MRI, magnetic resonance imaging; DCIS, ductal carcinoma in situ; NA, not applicable; IDC, invasive ductal carcinoma; ILC, invasive lobular carcinoma; HER2, human epidermal growth factor receptor 2

**eTable 2.** Characteristics of Detected Cancers in Women Treated with Breast Conservation Therapy

| Patient No. | Age (years) | BRCA mutation | Stage and Histology of Initial Cancer |                  |                          |              | Chemotherapy/Endocrine/Anti-HER2 Treatment | Preoperative MRI | Round (No.) | Time from the initial surgery to second breast cancer detection (Months) | MG Density | Laterality of Detected Cancer | Final Assessment Category at Breast Imaging and Reporting Data System |    |    | Stage of Detected Cancer    |           |       | Histology of Detected Cancer |               |                  |                         |             |
|-------------|-------------|---------------|---------------------------------------|------------------|--------------------------|--------------|--------------------------------------------|------------------|-------------|--------------------------------------------------------------------------|------------|-------------------------------|-----------------------------------------------------------------------|----|----|-----------------------------|-----------|-------|------------------------------|---------------|------------------|-------------------------|-------------|
|             |             |               | Stage                                 | Histologic Grade | Hormone receptor Status* | HER2 Status† |                                            |                  |             |                                                                          |            |                               | M                                                                     | U  | M  | T (Size of Invasive Cancer) | N(Number) | Stage | Type                         | Nuclear Grade | Histologic Grade | Hormone receptor Status | HER2 Status |
| 1           | 46          | Not done      | IIB                                   | Intermediate     | +                        | -            | +/+/-                                      | Performed        | 1           | 22                                                                       | 3          | Contralateral                 | 2                                                                     | 2  | 3  | 0                           | 0         | 0     | DCIS                         | Intermediate  | NA               | +                       | +           |
| 2           | 48          | Not done      | IA                                    | High             | -                        | +            | -/-                                        | Performed        | 1           | 20                                                                       | 3          | Ipsilateral                   | 2                                                                     | 3  | 4A | 0                           | 0         | 0     | DCIS                         | Low           | NA               | +                       | -           |
| 3           | 33          | Not done      | IA                                    | Intermediate     | +                        | -            | +/+/-                                      | Performed        | 1           | 13                                                                       | 4          | Ipsilateral                   | 2                                                                     | 2  | 4A | 1a (5 mm)                   | 0         | IA    | IDC                          | Intermediate  | Intermediate     | +                       | -           |
| 4           | 29          | Not done      | IA                                    | High             | +                        | +            | +/+                                        | Performed        | 1           | 6                                                                        | 4          | Ipsilateral                   | 4B                                                                    | 2  | 2  | 1b (8 mm)                   | 0         | IA    | IDC                          | Intermediate  | Intermediate     | +                       | -           |
| 5           | 44          | BRCA 2        | IA                                    | High             | -                        | -            | -/-                                        | Performed        | 1           | 6                                                                        | 4          | Contralateral                 | 4A                                                                    | 2  | 2  | 0                           | 0         | 0     | DCIS                         | Intermediate  | NA               | +                       | -           |
| 6           | 43          | Not done      | IIA                                   | High             | -                        | -            | +/-                                        | Not              | 1           | 6                                                                        | 2          | Contralateral                 | 4A                                                                    | 4C | 5  | 1b (8 mm)                   | 0         | IA    | IDC                          | High          | High             | -                       | -           |
| 7           | 42          | Not done      | IIIA                                  | High             | -                        | -            | +/-                                        | Performed        | 1           | 13                                                                       | 4          | Ipsilateral                   | 1                                                                     | 4B | 5  | 3 (75 mm)                   | 0         | IIB   | IDC                          | High          | High             | -                       | -           |
| 8           | 39          | BRCA 1        | IIA                                   | unknown          | -                        | -            | +/-                                        | Performed        | 1           | 11                                                                       | 3          | Contralateral                 | 5                                                                     | 5  | 5  | 2 (25 mm)                   | 0         | IIA   | IDC                          | High          | High             | -                       | -           |
| 9           | 39          | Not done      | IA                                    | Intermediate     | -                        | +            | -/+                                        | Not              | 1           | 27                                                                       | 3          | Ipsilateral                   | 4A                                                                    | 1  | 3  | 0                           | 0         | 0     | DCIS                         | High          | NA               | -                       | +           |
| 10          | 47          | Not done      | IIIB                                  | High             | +                        | +            | +/+                                        | Not              | 1           | 9                                                                        | 3          | Ipsilateral                   | 4C                                                                    | 5  | 5  | 2 (25 mm)                   | 0         | IIA   | IDC                          | High          | High             | -                       | +           |
| 11          | 41          | Not done      | IIA                                   | Low              | -                        | -            | +/-                                        | Performed        | 1           | 25                                                                       | 3          | Ipsilateral                   | 1                                                                     | 4A | 5  | 1c (11 mm)                  | 0         | IA    | IDC                          | High          | High             | -                       | -           |
| 12          | 49          | Not done      | 0                                     | Unknown          | +                        | +            | +/-                                        | Performed        | 1           | 30                                                                       | 4          | Ipsilateral                   | 3                                                                     | 3  | 4A | 0                           | 0         | 0     | DCIS                         | High          | NA               | -                       | +           |
| 13          | 50          | Not done      | IIA                                   | Intermediate     | +                        | -            | +/-                                        | Performed        | 2           | 13                                                                       | 2          | Ipsilateral                   | 2                                                                     | 4A | 4B | 1b (10 mm)                  | 0         | IA    | IDC                          | High          | High             | +                       | -           |
| 14          | 43          | Not done      | IA                                    | High             | -                        | +            | -/-                                        | Performed        | 2           | 6                                                                        | 4          | Ipsilateral                   | 1                                                                     | 3  | 4C | 0                           | 0         | 0     | DCIS                         | High          | NA               | +                       | +           |
| 15          | 44          | Not done      | IA                                    | Intermediate     | +                        | -            | +/-                                        | Performed        | 2           | 29                                                                       | 3          | Contralateral                 | 1                                                                     | 2  | 4A | 1mic (≤ 1 mm)               | 0         | IA    | IDC                          | Low           | Low              | +                       | +           |
| 16          | 50          | Not done      | IA                                    | Low              | +                        | -            | +/-                                        | Performed        | 3           | 26                                                                       | 3          | Contralateral                 | 4A                                                                    | 4B | 3  | 0                           | 0         | 0     | DCIS                         | High          | NA               | -                       | +           |
| 17          | 52          | Not done      | IIA                                   | Low              | -                        | -            | +/-                                        | Performed        | 3           | 41                                                                       | 4          | Contralateral                 | 4B                                                                    | 4B | 4B | 1c (15 mm)                  | 1         | IIA   | IDC                          | Intermediate  | Intermediate     | -                       | +           |

Abbreviations: HER2, human epidermal growth factor receptor 2; DCIS, ductal carcinoma in situ; IDC, invasive ductal carcinoma; M, metastasis; MG, mammography; MRI, magnetic resonance imaging; N, node status; NA, not applicable

\* Hormonal receptor–positive status was ER positive or PR positive. It was defined as the presence of 10% or more positively stained nuclei at  $\times 10$  magnification

† Intensity of ERBB2 staining was scored as 0, 1+, 2+, or 3+. The 3+ score were defined as HER2 positive, and the 0 or 1+ score were defined as negative. For tumors with 2+ score, *HER2* gene copies to the centromeric region of the chromosome 17 ratios of 2.2 or more on fluorescence in situ hybridization was interpreted as amplified

**eTable 3.** Screening Performances for Invasive Cancers in 754 Participants Screened Over 3 Years by Mammography, Ultrasound, and MRI

|                             | Mammography        |                   | Ultrasound         |                   | MRI                |                   | Mammography Plus Ultrasound |                   | Mammography v Mammography Plus Ultrasound | Mammography Plus MRI |                   | Mammography v Mammography Plus MRI |
|-----------------------------|--------------------|-------------------|--------------------|-------------------|--------------------|-------------------|-----------------------------|-------------------|-------------------------------------------|----------------------|-------------------|------------------------------------|
|                             | No./Total of Women | Estimate (95% CI) | No./Total of Women | Estimate (95% CI) | No./Total of Women | Estimate (95% CI) | No./Total of Women          | Estimate (95% CI) | p-value*                                  | No./Total of Women   | Estimate (95% CI) | p-value*                           |
| Yield, per 1000             | 5/2065             | 2.4 (0.3, 4.6)    | 7/2065             | 3.4 (0.9, 5.9)    | 9/2065             | 4.4 (1.5, 7.2)    | 8/2065                      | 3.9 (1.2, 6.6)    | .12                                       | 10/2065              | 4.8 (1.8, 7.9)    | .03                                |
| AUC                         |                    | 0.73 (0.53, 0.93) |                    | 0.92 (0.83, 1.00) |                    | 0.97 (0.91, 1.00) |                             | 0.92 (0.81, 1.00) | .18                                       |                      | 1.0 (0.95, 1.00)  | .02                                |
| Sensitivity, % <sup>†</sup> | 5/10               | 50 (24, 76)       | 7/10               | 70 (40, 89)       | 9/10               | 90 (60, 98)       | 8/10                        | 80 (49, 94)       | .16 <sup>#</sup>                          | 10/10                | 100 (72,100)      | .07 <sup>#</sup>                   |
| Specificity, %              | 1969/2055          | 96 (95, 97)       | 1853/2055          | 90 (89, 92)       | 1843/2055          | 90 (88, 91)       | 1795/2055                   | 87 (86, 89)       | <.001                                     | 1781/2055            | 87 (85, 88)       | <.001                              |
| PPV1, % <sup>‡</sup>        | 5/91               | 5.5 (0.7, 10.3)   | 7/209              | 3.3 (0.9, 5.8)    | 9/221              | 4.1 (1.5, 6.7)    | 8/268                       | 3.0 (0.9, 5.0)    | .09                                       | 10/284               | 3.5 (1.4, 5.7)    | .41                                |
| PPV3, % <sup>‡§</sup>       | 5/11               | 45 (21, 72)       | 7/23               | 30 (16, 51)       | 9/51               | 18 (10, 30)       | 8/29                        | 28 (15, 46)       | .21                                       | 10/56                | 18 (10, 30)       | .02                                |

Abbreviations: AUC, area under the curve, PPV, positive predictive value.

\* p-value was adjusted using Sidak method for each screening outcome.

<sup>†</sup> 95% Confidence interval was estimated from Wilson Score method.

<sup>#</sup> p-value by McNemar test

<sup>‡</sup> Defined as the malignancy rate of women with positive test including assessment of BI-RADS 3, 4A, 4B, 4C, or 5.

<sup>§</sup> Defined as the malignancy rate of women who underwent biopsy due to lesions classified as BI-RADS 3, 4A, 4B, 4C, or 5

**eTable 4.** Characteristics of Women With Second Breast Cancers Versus Those Without Cancers

| Characteristics                             | Women with second breast cancer, No. (%)<br>(n = 17) | Women without second breast cancer, No. (%)<br>(n = 737) | <i>P</i> |
|---------------------------------------------|------------------------------------------------------|----------------------------------------------------------|----------|
| Age at initial cancer diagnosis (years)     |                                                      |                                                          |          |
| < 40                                        | 5 (2)                                                | 237 (98)                                                 | >.99     |
| ≥ 40                                        | 12 (2)                                               | 500 (98)                                                 |          |
| Menopausal status                           |                                                      |                                                          |          |
| Pre or peri-menopause                       | 12 (4)                                               | 329 (96)                                                 | .03      |
| Post-menopause                              | 5 (1)                                                | 408 (99)                                                 |          |
| BRCA 1 or 2 mutation                        |                                                      |                                                          |          |
| Positive                                    | 2 (11.8)                                             | 15 (88.2)                                                | .61      |
| Negative                                    | 3 (6.8)                                              | 41 (93.2)                                                |          |
| Unknown                                     | 12                                                   | 681                                                      |          |
| Family history of breast cancer             |                                                      |                                                          |          |
| Absence                                     | 11 (2)                                               | 596 (98)                                                 | >.99     |
| Presence                                    | 0 (0)                                                | 42 (100)                                                 |          |
| Unknown                                     | 6                                                    | 99                                                       |          |
| Initial mammographic breast density         |                                                      |                                                          |          |
| Fatty, scattered, and heterogeneously dense | 10 (2)                                               | 549 (98)                                                 | .12      |
| Extremely dense                             | 7 (4)                                                | 188 (96)                                                 |          |
| Characteristics of initial cancer           |                                                      |                                                          |          |
| Pathologic stage                            |                                                      |                                                          |          |
| Stage 0 or I                                | 9 (2)                                                | 406 (98)                                                 | .86      |
| Stage II or III                             | 8 (2)                                                | 331 (98)                                                 |          |
| Histologic type                             |                                                      |                                                          |          |
| DCIS                                        | 1 (1)                                                | 71 (99)                                                  | >.99     |
| Invasive cancer                             | 16 (2)                                               | 664 (98)                                                 |          |
| Unknown                                     | 0                                                    | 2                                                        |          |
| Nuclear grade                               |                                                      |                                                          |          |
| Low to intermediate                         | 6 (2)                                                | 351 (98)                                                 | .29      |
| High                                        | 8 (3)                                                | 263 (97)                                                 |          |
| Unknown                                     | 3                                                    | 123                                                      |          |
| Histologic grade                            |                                                      |                                                          |          |
| Low to intermediate                         | 8 (2)                                                | 414 (98)                                                 | .43      |

|                         |        |          |      |
|-------------------------|--------|----------|------|
| High                    | 7 (3)  | 240 (97) |      |
| Unknown                 | 2      | 83       |      |
| ER status*              |        |          |      |
| Negative                | 9 (4)  | 197 (96) | .03  |
| Positive                | 8 (1)  | 537 (99) |      |
| Unknown                 | 0      | 3        |      |
| PR status*              |        |          | .01  |
| Negative                | 11 (4) | 261 (96) |      |
| Positive                | 6 (1)  | 474 (99) |      |
| Unknown                 | 0      | 2        |      |
| HER2 status†            |        |          | .01  |
| Negative                | 11 (2) | 641 (98) |      |
| Positive                | 6 (7)  | 85 (93)  |      |
| Unknown                 | 0      | 11       |      |
| Resection margin status |        |          | .03  |
| ≤ 2 mm                  | 12 (3) | 349 (97) |      |
| > 2 mm                  | 4 (1)  | 387 (99) |      |
| Unknown                 | 1      | 1        |      |
| Lymphovascular invasion |        |          | >.99 |
| Absence                 | 13 (2) | 538 (98) |      |
| Presence                | 4 (2)  | 183 (98) |      |
| Unknown                 | 0      | 16       |      |
| Chemotherapy            |        |          |      |
| Not performed           | 8 (3)  | 239 (97) | .20  |
| Performed               | 9 (2)  | 498 (98) |      |
| Endocrine treatment     |        |          | .03  |
| Not performed           | 9 (4)  | 197 (96) |      |
| Performed               | 8 (1)  | 537 (99) |      |
| Unknown                 | 0      | 3        |      |
| Preoperative MRI        |        |          | .15  |
| Not performed           | 3 (5)  | 58 (95)  |      |
| Performed               | 14 (2) | 679 (98) |      |

Abbreviations: DCIS, ductal carcinoma in situ, ER, estrogen receptor, PR, progesterone receptor, HER2, human epidermal growth factor receptor 2

\* ER and PR positivity were defined as the presence of 10% or more positively stained nuclei at 10X magnification

†HER-2 positivity was defined as either HER2 gene amplification (fluorescent in situ hybridization) or were scored as 3+ on immunohistochemistry staging for c-erbB-2 which was scored as 0, 1+, 2+, or 3+.
